# Supplementary material for: East Asian Young and Older Adult Perceptions of Emotional Faces From an Age- and Sex-Fair East Asian Facial Expression Database
Source: Front Psychol. 2018 Nov 29;9:2358. doi: 10.3389/fpsyg.2018.02358 (PMC6281963; doi:10.3389/fpsyg.2018.02358)
Supplement: Supplementary file 8 [file Table_2.XLSX]

## Sheet: Sup_Table_2
Supplementary Table 2. Coefficients from the multivariate MCMC mixed-model analysis evaluting the effect of assigned face emotion category, rater age and sex, and face stimuli age and sex on the six rated emotion dimensions. Young males rating neutral young male faces constitute the baseline from which all coefficients indicate deviations.
			Rater		Face			95% CI
Row	Rated Emotion Dimension	Face Emotion Category	Age	Sex	Age	Sex	Posterior Mean	LL	UL	pMCMC	Significance
1	Happiness	Neutral					0.855	0.244	1.453	0.004	**
2	Sadness	Neutral					1.617	0.856	2.311	< 0.001	***
3	Anger	Neutral					1.343	0.639	2.012	< 0.001	***
4	Disgust	Neutral					1.404	0.703	2.158	< 0.001	***
5	Fear	Neutral					1.051	0.257	1.857	0.014	*
6	Surprise	Neutral					0.878	0.194	1.631	0.018	*
7	Happiness	Happy					5.378	4.772	5.999	< 0.001	***
8	Sadness	Happy					0.806	0.102	1.516	0.036	*
9	Anger	Happy					0.732	0.102	1.458	0.03	*
10	Disgust	Happy					0.875	0.201	1.62	0.022	*
11	Fear	Happy					0.829	0.03	1.646	0.056
12	Surprise	Happy					1.243	0.539	1.984	0.002	**
13	Happiness	Sad					0.575	-0.035	1.212	0.062
14	Sadness	Sad					3.718	3.016	4.476	< 0.001	***
15	Anger	Sad					1.874	1.151	2.623	< 0.001	***
16	Disgust	Sad					2.602	1.922	3.342	< 0.001	***
17	Fear	Sad					1.936	1.15	2.718	< 0.001	***
18	Surprise	Sad					0.972	0.153	1.616	0.008	**
19	Happiness	Angry					0.871	0.245	1.519	0.006	**
20	Sadness	Angry					1.695	0.915	2.303	< 0.001	***
21	Anger	Angry					4.443	3.737	5.133	< 0.001	***
22	Disgust	Angry					3.5	2.819	4.194	< 0.001	***
23	Fear	Angry					1.5	0.725	2.258	< 0.001	***
24	Surprise	Angry					1.733	1.011	2.447	< 0.001	***
25	Happiness	Disgusted					0.728	0.088	1.377	0.024	*
26	Sadness	Disgusted					2.012	1.266	2.686	< 0.001	***
27	Anger	Disgusted					3.184	2.485	3.885	< 0.001	***
28	Disgust	Disgusted					3.963	3.264	4.646	< 0.001	***
29	Fear	Disgusted					2.059	1.172	2.778	< 0.001	***
30	Surprise	Disgusted					1.366	0.72	2.204	0.002	**
31	Happiness	Fearful					0.974	0.276	1.555	0.004	**
32	Sadness	Fearful					1.573	0.892	2.37	< 0.001	***
33	Anger	Fearful					1.749	1.083	2.497	< 0.001	***
34	Disgust	Fearful					2.426	1.732	3.152	< 0.001	***
35	Fear	Fearful					3.238	2.519	4.099	< 0.001	***
36	Surprise	Fearful					4.061	3.336	4.782	< 0.001	***
37	Happiness	Surprised					1.263	0.651	1.9	< 0.001	***
38	Sadness	Surprised					0.979	0.331	1.747	0.01	*
39	Anger	Surprised					1.022	0.334	1.753	0.006	**
40	Disgust	Surprised					1.114	0.437	1.842	0.002	**
41	Fear	Surprised					2.215	1.514	3.099	< 0.001	***
42	Surprise	Surprised					5.629	4.873	6.295	< 0.001	***
43	Happiness		Old				0.368	-0.565	1.234	0.41
44	Sadness		Old				-0.073	-1.133	0.906	0.868
45	Anger		Old				0.261	-0.741	1.183	0.602
46	Disgust		Old				0.232	-0.778	1.16	0.634
47	Fear		Old				0.513	-0.613	1.659	0.38
48	Surprise		Old				0.665	-0.366	1.597	0.2
49	Happiness			Female			-0.667	-1.45	0.249	0.124
50	Sadness			Female			-0.631	-1.535	0.256	0.172
51	Anger			Female			-0.717	-1.608	0.177	0.112
52	Disgust			Female			-0.761	-1.721	0.146	0.116
53	Fear			Female			-0.502	-1.6	0.503	0.354
54	Surprise			Female			-0.685	-1.573	0.205	0.138
55	Happiness	Happy	Old				-0.781	-1.044	-0.502	< 0.001	***
56	Sadness	Happy	Old				-0.277	-0.603	0.032	0.094
57	Anger	Happy	Old				-0.555	-0.942	-0.234	< 0.001	***
58	Disgust	Happy	Old				-0.494	-0.851	-0.112	0.014	*
59	Fear	Happy	Old				-0.748	-1.074	-0.46	< 0.001	***
60	Surprise	Happy	Old				-1.053	-1.372	-0.719	< 0.001	***
61	Happiness	Sad	Old				-0.113	-0.404	0.141	0.436
62	Sadness	Sad	Old				-0.606	-0.927	-0.308	< 0.001	***
63	Anger	Sad	Old				0.347	0.019	0.694	0.04	*
64	Disgust	Sad	Old				-0.42	-0.78	-0.028	0.026	*
65	Fear	Sad	Old				-0.552	-0.874	-0.218	0.002	**
66	Surprise	Sad	Old				0.375	0.035	0.685	0.018	*
67	Happiness	Angry	Old				-0.473	-0.722	-0.184	0.002	**
68	Sadness	Angry	Old				0.436	0.145	0.755	0.002	**
69	Anger	Angry	Old				-0.448	-0.794	-0.095	0.002	**
70	Disgust	Angry	Old				-0.655	-0.997	-0.298	< 0.001	***
71	Fear	Angry	Old				-0.026	-0.348	0.306	0.848
72	Surprise	Angry	Old				0.026	-0.271	0.404	0.87
73	Happiness	Disgusted	Old				-0.472	-0.751	-0.209	< 0.001	***
74	Sadness	Disgusted	Old				0.28	-0.018	0.612	0.078
75	Anger	Disgusted	Old				0.079	-0.287	0.41	0.656
76	Disgust	Disgusted	Old				-0.734	-1.097	-0.388	< 0.001	***
77	Fear	Disgusted	Old				-0.425	-0.747	-0.099	0.012	*
78	Surprise	Disgusted	Old				0.254	-0.069	0.588	0.128
79	Happiness	Fearful	Old				-0.545	-0.803	-0.232	< 0.001	***
80	Sadness	Fearful	Old				0.341	0.01	0.646	0.032	*
81	Anger	Fearful	Old				-0.152	-0.465	0.212	0.412
82	Disgust	Fearful	Old				-0.818	-1.197	-0.468	< 0.001	***
83	Fear	Fearful	Old				-0.948	-1.28	-0.64	< 0.001	***
84	Surprise	Fearful	Old				-0.361	-0.71	-0.01	0.054
85	Happiness	Surprised	Old				-0.915	-1.195	-0.662	< 0.001	***
86	Sadness	Surprised	Old				0.706	0.419	1.031	< 0.001	***
87	Anger	Surprised	Old				0.188	-0.162	0.515	0.28
88	Disgust	Surprised	Old				0.527	0.17	0.905	0.006	**
89	Fear	Surprised	Old				0.167	-0.166	0.47	0.324
90	Surprise	Surprised	Old				-1.553	-1.859	-1.205	< 0.001	***
91	Happiness	Happy		Female			0.745	0.474	1.001	< 0.001	***
92	Sadness	Happy		Female			-0.029	-0.339	0.299	0.83
93	Anger	Happy		Female			0.006	-0.333	0.332	0.986
94	Disgust	Happy		Female			-0.032	-0.392	0.315	0.858
95	Fear	Happy		Female			-0.174	-0.512	0.13	0.268
96	Surprise	Happy		Female			-0.001	-0.356	0.342	0.982
97	Happiness	Sad		Female			0.142	-0.109	0.427	0.294
98	Sadness	Sad		Female			0.37	0.055	0.718	0.026	*
99	Anger	Sad		Female			0.829	0.494	1.18	< 0.001	***
100	Disgust	Sad		Female			0.441	0.115	0.821	0.012	*
101	Fear	Sad		Female			0.317	-0.003	0.623	0.044	*
102	Surprise	Sad		Female			0.263	-0.075	0.588	0.11
103	Happiness	Angry		Female			-0.072	-0.334	0.18	0.578
104	Sadness	Angry		Female			0.107	-0.2	0.4	0.498
105	Anger	Angry		Female			0.931	0.609	1.248	< 0.001	***
106	Disgust	Angry		Female			1.083	0.734	1.423	< 0.001	***
107	Fear	Angry		Female			0.505	0.197	0.803	0.002	**
108	Surprise	Angry		Female			0.625	0.261	0.936	< 0.001	***
109	Happiness	Disgusted		Female			-0.045	-0.295	0.238	0.738
110	Sadness	Disgusted		Female			0.27	-0.065	0.539	0.088
111	Anger	Disgusted		Female			1.056	0.734	1.409	< 0.001	***
112	Disgust	Disgusted		Female			1.156	0.785	1.509	< 0.001	***
113	Fear	Disgusted		Female			0.226	-0.091	0.541	0.17
114	Surprise	Disgusted		Female			0.244	-0.09	0.579	0.142
115	Happiness	Fearful		Female			-0.084	-0.346	0.191	0.578
116	Sadness	Fearful		Female			0.301	-0.025	0.6	0.066
117	Anger	Fearful		Female			0.288	-0.039	0.623	0.082
118	Disgust	Fearful		Female			0.428	0.056	0.747	0.016	*
119	Fear	Fearful		Female			0.385	0.074	0.689	0.026	*
120	Surprise	Fearful		Female			0.85	0.52	1.209	< 0.001	***
121	Happiness	Surprised		Female			-0.296	-0.595	-0.058	0.038	*
122	Sadness	Surprised		Female			0.081	-0.221	0.442	0.614
123	Anger	Surprised		Female			0.14	-0.178	0.448	0.412
124	Disgust	Surprised		Female			0.13	-0.216	0.465	0.486
125	Fear	Surprised		Female			-0.028	-0.338	0.295	0.834
126	Surprise	Surprised		Female			1.264	0.923	1.598	< 0.001	***
127	Happiness		Old	Female			0.503	-0.751	1.644	0.384
128	Sadness		Old	Female			-0.008	-1.357	1.32	0.95
129	Anger		Old	Female			0.035	-1.18	1.421	0.968
130	Disgust		Old	Female			-0.208	-1.523	1.023	0.722
131	Fear		Old	Female			-0.729	-2.234	0.755	0.366
132	Surprise		Old	Female			-0.579	-1.819	0.724	0.366
133	Happiness	Happy	Old	Female			-0.216	-0.493	0.098	0.184
134	Sadness	Happy	Old	Female			0.358	-0.024	0.721	0.066
135	Anger	Happy	Old	Female			0.339	-0.019	0.75	0.082
136	Disgust	Happy	Old	Female			0.542	0.124	0.923	0.006	**
137	Fear	Happy	Old	Female			0.942	0.588	1.307	< 0.001	***
138	Surprise	Happy	Old	Female			0.668	0.261	1.017	< 0.001	***
139	Happiness	Sad	Old	Female			-0.54	-0.823	-0.215	< 0.001	***
140	Sadness	Sad	Old	Female			-0.525	-0.915	-0.171	0.002	**
141	Anger	Sad	Old	Female			-1.072	-1.477	-0.706	< 0.001	***
142	Disgust	Sad	Old	Female			-0.848	-1.286	-0.48	< 0.001	***
143	Fear	Sad	Old	Female			-0.579	-0.95	-0.232	0.002	**
144	Surprise	Sad	Old	Female			-0.589	-0.933	-0.221	< 0.001	***
145	Happiness	Angry	Old	Female			-0.27	-0.571	0.012	0.072
146	Sadness	Angry	Old	Female			-1.026	-1.433	-0.688	< 0.001	***
147	Anger	Angry	Old	Female			-0.702	-1.084	-0.335	< 0.001	***
148	Disgust	Angry	Old	Female			-1.307	-1.725	-0.929	< 0.001	***
149	Fear	Angry	Old	Female			-0.838	-1.165	-0.436	< 0.001	***
150	Surprise	Angry	Old	Female			-0.902	-1.293	-0.567	< 0.001	***
151	Happiness	Disgusted	Old	Female			-0.144	-0.447	0.153	0.358
152	Sadness	Disgusted	Old	Female			-0.97	-1.347	-0.615	< 0.001	***
153	Anger	Disgusted	Old	Female			-1.213	-1.585	-0.81	< 0.001	***
154	Disgust	Disgusted	Old	Female			-1.244	-1.68	-0.877	< 0.001	***
155	Fear	Disgusted	Old	Female			-0.578	-0.94	-0.247	< 0.001	***
156	Surprise	Disgusted	Old	Female			-0.754	-1.188	-0.408	< 0.001	***
157	Happiness	Fearful	Old	Female			-0.028	-0.342	0.278	0.86
158	Sadness	Fearful	Old	Female			-0.898	-1.273	-0.558	< 0.001	***
159	Anger	Fearful	Old	Female			-0.787	-1.176	-0.412	< 0.001	***
160	Disgust	Fearful	Old	Female			-0.526	-0.91	-0.093	0.014	*
161	Fear	Fearful	Old	Female			-0.688	-1.03	-0.319	< 0.001	***
162	Surprise	Fearful	Old	Female			-0.915	-1.295	-0.537	< 0.001	***
163	Happiness	Surprised	Old	Female			0.449	0.15	0.756	0.008	**
164	Sadness	Surprised	Old	Female			-0.667	-1.041	-0.294	< 0.001	***
165	Anger	Surprised	Old	Female			-0.572	-0.921	-0.178	0.004	**
166	Disgust	Surprised	Old	Female			-0.532	-0.933	-0.149	0.006	**
167	Fear	Surprised	Old	Female			-0.237	-0.608	0.125	0.176
168	Surprise	Surprised	Old	Female			-0.453	-0.843	-0.08	0.014	*
169	Happiness	Neutral	Young		Old		0.439	0.128	0.735	0.004	**
170	Sadness	Neutral	Young		Old		0.034	-0.306	0.365	0.85
171	Anger	Neutral	Young		Old		-0.135	-0.505	0.295	0.49
172	Disgust	Neutral	Young		Old		0.003	-0.339	0.383	0.974
173	Fear	Neutral	Young		Old		0.055	-0.24	0.377	0.706
174	Surprise	Neutral	Young		Old		-0.009	-0.349	0.339	0.956
175	Happiness	Happy	Young		Old		-0.436	-0.75	-0.14	0.004	**
176	Sadness	Happy	Young		Old		0.057	-0.269	0.416	0.75
177	Anger	Happy	Young		Old		0.061	-0.345	0.427	0.738
178	Disgust	Happy	Young		Old		0.043	-0.29	0.394	0.832
179	Fear	Happy	Young		Old		0.088	-0.221	0.359	0.564
180	Surprise	Happy	Young		Old		-0.074	-0.378	0.346	0.674
181	Happiness	Sad	Young		Old		0.119	-0.198	0.451	0.478
182	Sadness	Sad	Young		Old		-1.082	-1.413	-0.71	< 0.001	***
183	Anger	Sad	Young		Old		0.223	-0.209	0.577	0.264
184	Disgust	Sad	Young		Old		0.039	-0.28	0.421	0.83
185	Fear	Sad	Young		Old		-0.37	-0.667	-0.081	0.012	*
186	Surprise	Sad	Young		Old		0.271	-0.092	0.596	0.13
187	Happiness	Angry	Young		Old		0.014	-0.266	0.332	0.92
188	Sadness	Angry	Young		Old		0.217	-0.103	0.564	0.216
189	Anger	Angry	Young		Old		-0.612	-0.998	-0.222	< 0.001	***
190	Disgust	Angry	Young		Old		0.043	-0.258	0.417	0.822
191	Fear	Angry	Young		Old		0.229	-0.062	0.509	0.114
192	Surprise	Angry	Young		Old		-0.078	-0.416	0.252	0.668
193	Happiness	Disgusted	Young		Old		0.246	-0.066	0.563	0.148
194	Sadness	Disgusted	Young		Old		-0.522	-0.896	-0.219	0.002	**
195	Anger	Disgusted	Young		Old		0.073	-0.302	0.481	0.746
196	Disgust	Disgusted	Young		Old		-0.276	-0.646	0.06	0.13
197	Fear	Disgusted	Young		Old		-0.207	-0.478	0.072	0.14
198	Surprise	Disgusted	Young		Old		0.342	0.015	0.711	0.06
199	Happiness	Fearful	Young		Old		-0.052	-0.38	0.263	0.766
200	Sadness	Fearful	Young		Old		-0.055	-0.413	0.258	0.78
201	Anger	Fearful	Young		Old		0.081	-0.325	0.449	0.71
202	Disgust	Fearful	Young		Old		-0.397	-0.738	-0.049	0.03	*
203	Fear	Fearful	Young		Old		-0.423	-0.717	-0.111	0.008	**
204	Surprise	Fearful	Young		Old		-0.019	-0.373	0.346	0.924
205	Happiness	Surprised	Young		Old		0	-0.279	0.317	0.986
206	Sadness	Surprised	Young		Old		0.222	-0.12	0.558	0.216
207	Anger	Surprised	Young		Old		0.346	-0.093	0.708	0.08
208	Disgust	Surprised	Young		Old		0.468	0.098	0.808	0.01	*
209	Fear	Surprised	Young		Old		0.471	0.207	0.775	0.002	**
210	Surprise	Surprised	Young		Old		-0.242	-0.579	0.079	0.168
211	Happiness	Neutral	Old		Old		0.393	0.083	0.71	0.012	*
212	Sadness	Neutral	Old		Old		-0.066	-0.412	0.259	0.706
213	Anger	Neutral	Old		Old		-0.346	-0.69	0.053	0.072
214	Disgust	Neutral	Old		Old		-0.113	-0.459	0.21	0.546
215	Fear	Neutral	Old		Old		-0.08	-0.39	0.195	0.584
216	Surprise	Neutral	Old		Old		-0.031	-0.364	0.322	0.85
217	Happiness	Happy	Old		Old		-0.344	-0.628	-0.048	0.022	*
218	Sadness	Happy	Old		Old		0.05	-0.302	0.38	0.756
219	Anger	Happy	Old		Old		0.057	-0.37	0.413	0.8
220	Disgust	Happy	Old		Old		0.07	-0.28	0.388	0.684
221	Fear	Happy	Old		Old		0.073	-0.235	0.344	0.64
222	Surprise	Happy	Old		Old		-0.011	-0.326	0.365	0.92
223	Happiness	Sad	Old		Old		0.175	-0.112	0.498	0.27
224	Sadness	Sad	Old		Old		-0.445	-0.731	-0.096	0.004	**
225	Anger	Sad	Old		Old		-0.028	-0.385	0.381	0.856
226	Disgust	Sad	Old		Old		-0.004	-0.372	0.331	0.962
227	Fear	Sad	Old		Old		0.063	-0.215	0.351	0.636
228	Surprise	Sad	Old		Old		0.018	-0.297	0.348	0.93
229	Happiness	Angry	Old		Old		0.04	-0.266	0.339	0.784
230	Sadness	Angry	Old		Old		0.261	-0.052	0.591	0.116
231	Anger	Angry	Old		Old		-0.825	-1.241	-0.446	< 0.001	***
232	Disgust	Angry	Old		Old		-0.034	-0.352	0.321	0.814
233	Fear	Angry	Old		Old		0.323	0.047	0.603	0.036	*
234	Surprise	Angry	Old		Old		0.001	-0.318	0.367	0.996
235	Happiness	Disgusted	Old		Old		0.25	-0.033	0.568	0.112
236	Sadness	Disgusted	Old		Old		-0.188	-0.497	0.159	0.28
237	Anger	Disgusted	Old		Old		-0.351	-0.734	0.026	0.058
238	Disgust	Disgusted	Old		Old		-0.036	-0.362	0.346	0.85
239	Fear	Disgusted	Old		Old		-0.048	-0.326	0.242	0.71
240	Surprise	Disgusted	Old		Old		-0.037	-0.403	0.291	0.856
241	Happiness	Fearful	Old		Old		0.048	-0.258	0.369	0.766
242	Sadness	Fearful	Old		Old		-0.039	-0.379	0.277	0.786
243	Anger	Fearful	Old		Old		0.024	-0.358	0.378	0.928
244	Disgust	Fearful	Old		Old		-0.002	-0.331	0.328	0.988
245	Fear	Fearful	Old		Old		0.019	-0.261	0.321	0.852
246	Surprise	Fearful	Old		Old		-0.392	-0.747	-0.02	0.042	*
247	Happiness	Surprised	Old		Old		0.054	-0.245	0.329	0.724
248	Sadness	Surprised	Old		Old		-0.059	-0.384	0.285	0.714
249	Anger	Surprised	Old		Old		0.124	-0.326	0.462	0.54
250	Disgust	Surprised	Old		Old		0.034	-0.298	0.396	0.85
251	Fear	Surprised	Old		Old		0.24	-0.015	0.561	0.09
252	Surprise	Surprised	Old		Old		-0.199	-0.581	0.102	0.25
253	Happiness	Neutral		Male		Female	-0.106	-0.444	0.199	0.5
254	Sadness	Neutral		Male		Female	-0.177	-0.559	0.165	0.34
255	Anger	Neutral		Male		Female	0.016	-0.396	0.39	0.948
256	Disgust	Neutral		Male		Female	-0.138	-0.489	0.234	0.462
257	Fear	Neutral		Male		Female	-0.183	-0.464	0.132	0.224
258	Surprise	Neutral		Male		Female	-0.01	-0.415	0.33	0.942
259	Happiness	Happy		Male		Female	0.116	-0.191	0.436	0.494
260	Sadness	Happy		Male		Female	0.034	-0.339	0.334	0.826
261	Anger	Happy		Male		Female	0.056	-0.319	0.457	0.79
262	Disgust	Happy		Male		Female	0.005	-0.355	0.383	0.996
263	Fear	Happy		Male		Female	-0.068	-0.393	0.19	0.624
264	Surprise	Happy		Male		Female	0.009	-0.401	0.325	0.978
265	Happiness	Sad		Male		Female	0.058	-0.261	0.378	0.732
266	Sadness	Sad		Male		Female	0.264	-0.089	0.587	0.154
267	Anger	Sad		Male		Female	0.38	-0.024	0.819	0.07
268	Disgust	Sad		Male		Female	-0.039	-0.438	0.297	0.806
269	Fear	Sad		Male		Female	0.125	-0.164	0.427	0.432
270	Surprise	Sad		Male		Female	0.222	-0.134	0.605	0.244
271	Happiness	Angry		Male		Female	-0.068	-0.382	0.24	0.698
272	Sadness	Angry		Male		Female	0.124	-0.228	0.456	0.488
273	Anger	Angry		Male		Female	-0.058	-0.443	0.369	0.826
274	Disgust	Angry		Male		Female	0.092	-0.249	0.441	0.608
275	Fear	Angry		Male		Female	0.133	-0.123	0.415	0.374
276	Surprise	Angry		Male		Female	-0.059	-0.454	0.246	0.732
277	Happiness	Disgusted		Male		Female	0.225	-0.078	0.543	0.158
278	Sadness	Disgusted		Male		Female	0.131	-0.226	0.455	0.444
279	Anger	Disgusted		Male		Female	-0.031	-0.45	0.38	0.9
280	Disgust	Disgusted		Male		Female	-0.318	-0.678	0.045	0.088
281	Fear	Disgusted		Male		Female	-0.129	-0.441	0.155	0.394
282	Surprise	Disgusted		Male		Female	-0.151	-0.467	0.234	0.428
283	Happiness	Fearful		Male		Female	0.001	-0.303	0.339	0.99
284	Sadness	Fearful		Male		Female	0.296	-0.091	0.608	0.092
285	Anger	Fearful		Male		Female	0.089	-0.276	0.513	0.66
286	Disgust	Fearful		Male		Female	0.19	-0.15	0.512	0.302
287	Fear	Fearful		Male		Female	-0.153	-0.486	0.106	0.306
288	Surprise	Fearful		Male		Female	-0.416	-0.798	-0.051	0.026	*
289	Happiness	Surprised		Male		Female	0.248	-0.051	0.561	0.116
290	Sadness	Surprised		Male		Female	-0.157	-0.516	0.164	0.366
291	Anger	Surprised		Male		Female	-0.188	-0.565	0.236	0.372
292	Disgust	Surprised		Male		Female	-0.173	-0.531	0.204	0.354
293	Fear	Surprised		Male		Female	-0.521	-0.805	-0.213	< 0.001	***
294	Surprise	Surprised		Male		Female	-0.056	-0.394	0.322	0.782
295	Happiness	Neutral		Female		Female	0.117	-0.187	0.401	0.444
296	Sadness	Neutral		Female		Female	-0.291	-0.608	0.026	0.078
297	Anger	Neutral		Female		Female	-0.025	-0.445	0.354	0.916
298	Disgust	Neutral		Female		Female	-0.056	-0.383	0.316	0.74
299	Fear	Neutral		Female		Female	-0.054	-0.325	0.222	0.704
300	Surprise	Neutral		Female		Female	-0.043	-0.384	0.304	0.788
301	Happiness	Happy		Female		Female	0.078	-0.202	0.409	0.618
302	Sadness	Happy		Female		Female	-0.086	-0.429	0.208	0.596
303	Anger	Happy		Female		Female	-0.034	-0.372	0.395	0.864
304	Disgust	Happy		Female		Female	-0.087	-0.401	0.255	0.644
305	Fear	Happy		Female		Female	-0.046	-0.336	0.228	0.754
306	Surprise	Happy		Female		Female	-0.031	-0.367	0.298	0.894
307	Happiness	Sad		Female		Female	-0.009	-0.294	0.315	0.944
308	Sadness	Sad		Female		Female	0.296	-0.068	0.609	0.102
309	Anger	Sad		Female		Female	0.389	-0.002	0.783	0.058
310	Disgust	Sad		Female		Female	0.225	-0.117	0.578	0.202
311	Fear	Sad		Female		Female	0.264	-0.009	0.542	0.07
312	Surprise	Sad		Female		Female	0.105	-0.212	0.462	0.544
313	Happiness	Angry		Female		Female	-0.011	-0.327	0.293	0.978
314	Sadness	Angry		Female		Female	0.073	-0.286	0.377	0.668
315	Anger	Angry		Female		Female	-0.062	-0.442	0.361	0.778
316	Disgust	Angry		Female		Female	0.164	-0.153	0.515	0.338
317	Fear	Angry		Female		Female	0.054	-0.22	0.312	0.674
318	Surprise	Angry		Female		Female	-0.179	-0.488	0.161	0.276
319	Happiness	Disgusted		Female		Female	0.141	-0.155	0.449	0.378
320	Sadness	Disgusted		Female		Female	0.069	-0.229	0.402	0.702
321	Anger	Disgusted		Female		Female	0.036	-0.362	0.396	0.836
322	Disgust	Disgusted		Female		Female	-0.178	-0.522	0.153	0.344
323	Fear	Disgusted		Female		Female	-0.049	-0.315	0.265	0.726
324	Surprise	Disgusted		Female		Female	0.034	-0.302	0.378	0.846
325	Happiness	Fearful		Female		Female	0.019	-0.308	0.311	0.862
326	Sadness	Fearful		Female		Female	0.268	-0.076	0.582	0.102
327	Anger	Fearful		Female		Female	0.357	-0.067	0.734	0.092
328	Disgust	Fearful		Female		Female	0.163	-0.192	0.485	0.36
329	Fear	Fearful		Female		Female	-0.044	-0.325	0.239	0.748
330	Surprise	Fearful		Female		Female	-0.267	-0.611	0.051	0.13
331	Happiness	Surprised		Female		Female	0.297	-0.023	0.586	0.068
332	Sadness	Surprised		Female		Female	-0.229	-0.551	0.077	0.152
333	Anger	Surprised		Female		Female	-0.123	-0.498	0.239	0.5
334	Disgust	Surprised		Female		Female	-0.217	-0.543	0.129	0.218
335	Fear	Surprised		Female		Female	-0.291	-0.587	-0.03	0.032	*
336	Surprise	Surprised		Female		Female	-0.227	-0.564	0.117	0.192
Note. Rows 1 - 42: main effects of face emotion categories; Row 43 - 48: main effects of rater age; Row 49 - 54: main effects of rater sex; Row 55 - 90: interaction effects of face emotion categories and rater age; Row 91 - 126: interaction effects of face emotion categories and rater sex; Row 127 - 132: interaction effects of rater age and rater sex; Row 133 - 168: interaction effects of face em…
